# Supplementary material
Source: Springer Nature journal article supplement (https://www.springermedizin.de/resource/supplementary/12889_2012_5824_MOESM9_ESM.pdf/9496206)

**Figure 6**

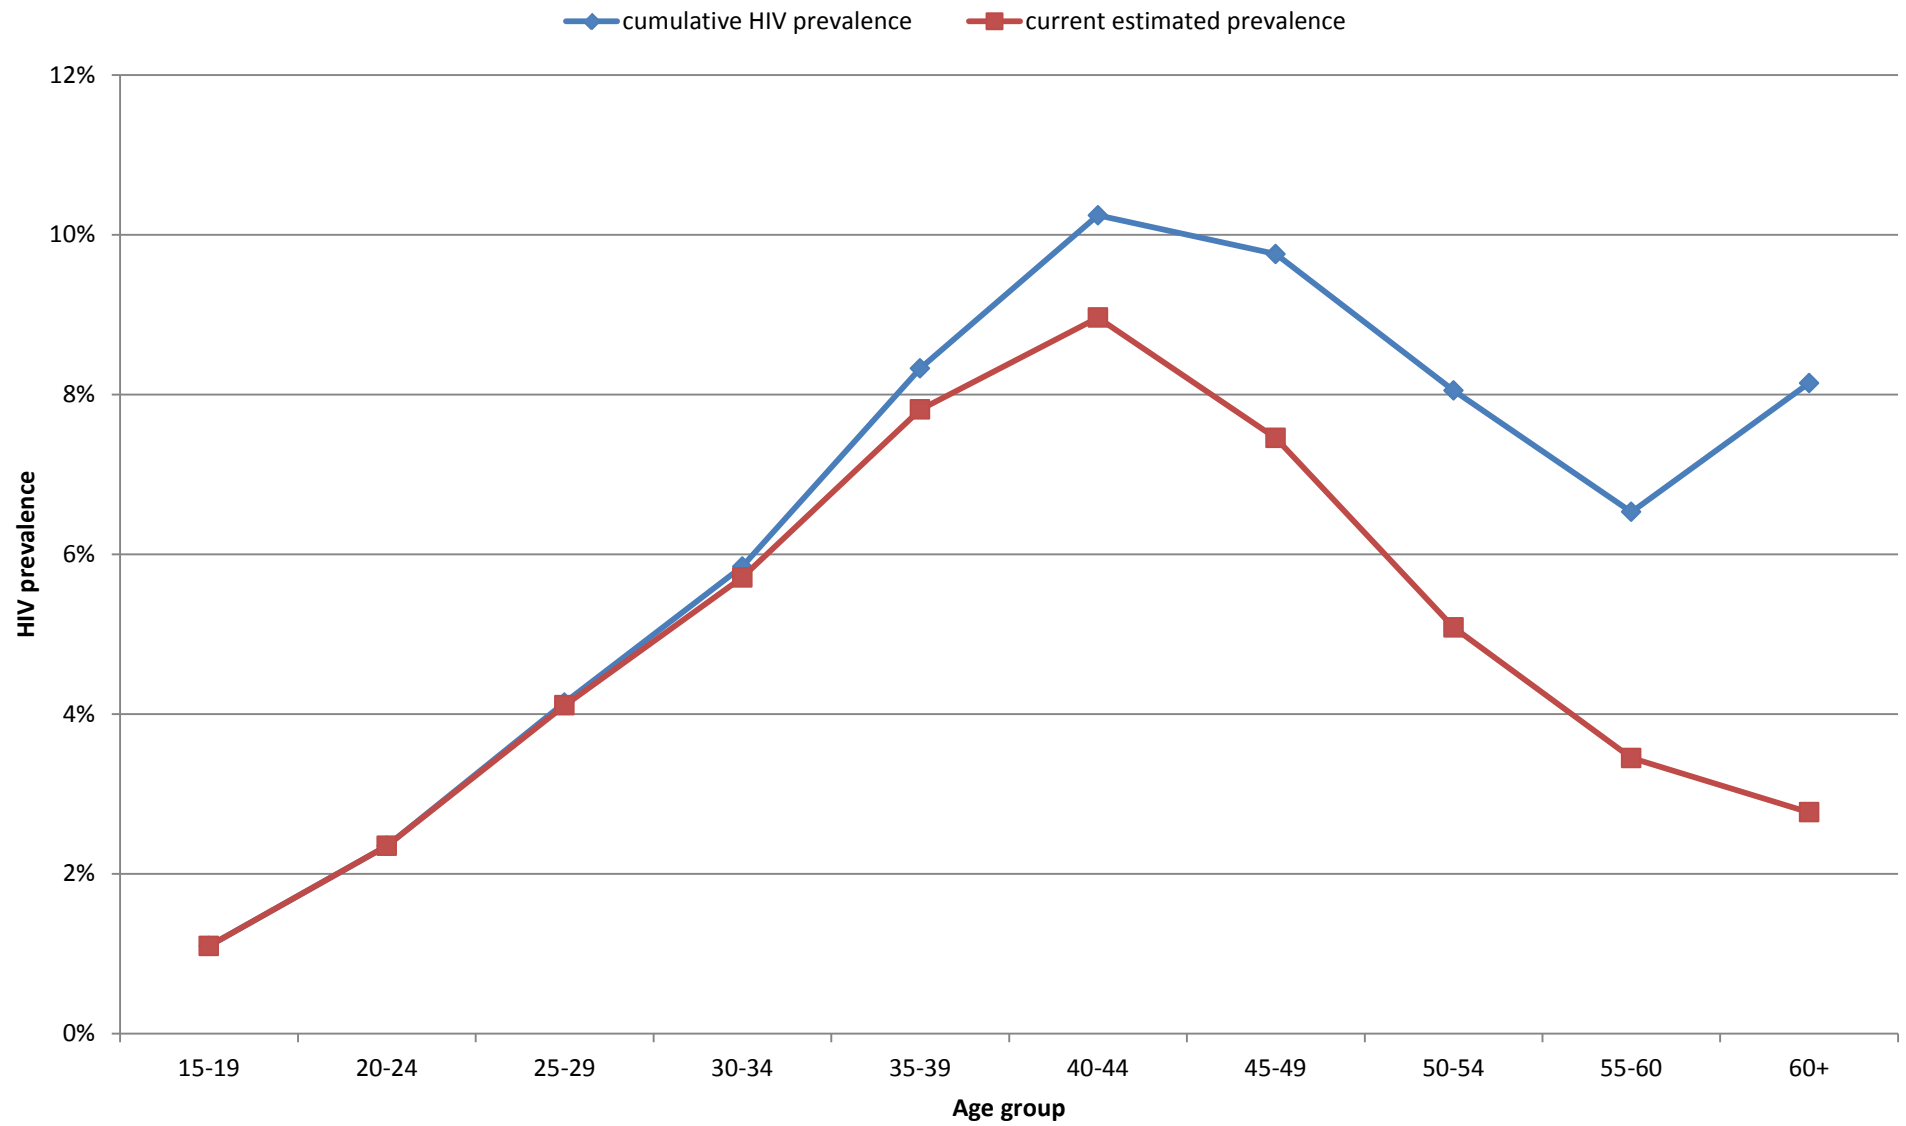

Supplement: MOESM9 [file 9496206]
